# Supplementary material for: A Comparative Study of Laser-Induced Graphene by CO2 Infrared Laser and 355 nm Ultraviolet (UV) Laser
Source: PubMed Central journal article supplement (PMC7764730; doi:10.3390/mi11121094), 2020-12-11
Supplement: micromachines-11-01094-s001.pdf [file micromachines-11-01094-s001.pdf]

## Supplementary Materials

# A comparative study of laser-induced graphene by CO<sub>2</sub> infrared laser and 355 nm Ultraviolet (UV) laser

Liyong WANG <sup>1</sup>, Zhiwen WANG <sup>1</sup>, Ali Naderi Bakhtiyari <sup>1</sup> and Hongyu ZHENG <sup>1,\*</sup>

<sup>1</sup> Centre for Advanced Laser Manufacturing (CALM), School of Mechanical Engineering, Shandong University of Technology, Zibo 255000, Shandong

\* Correspondence: [zhenghongyu@sdut.edu.cn](mailto:zhenghongyu@sdut.edu.cn); Tel.: +86-533-2780169

**Table S1.** The main properties of the PI

| Substrate | Type      | Thickness | Thermal decomposition temperature | Relative density | Tensile strength |
|-----------|-----------|-----------|-----------------------------------|------------------|------------------|
| PI        | Thermoset | 0.125 mm  | 550°C                             | 1.4              | 200 MPa          |

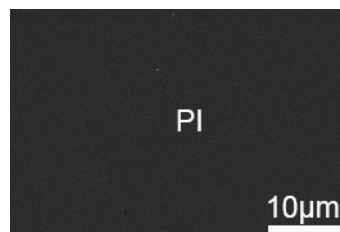

**Figure S1.** The SEM image of the pristine PI surface

**Publisher's Note:** MDPI stays neutral with regard to jurisdictional claims in published maps and institutional affiliations.

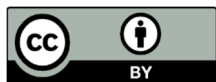

© 2020 by the authors. Submitted for possible open access publication under the terms and conditions of the Creative Commons Attribution (CC BY) license (<http://creativecommons.org/licenses/by/4.0/>).
